# Supplementary material
Source: Springer Nature journal article supplement (https://www.springermedizin.de/resource/supplementary/12986_2012_559_MOESM7_ESM.pdf/25655022)

# p-ERK and Bax Protein

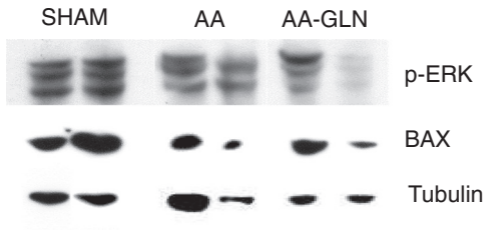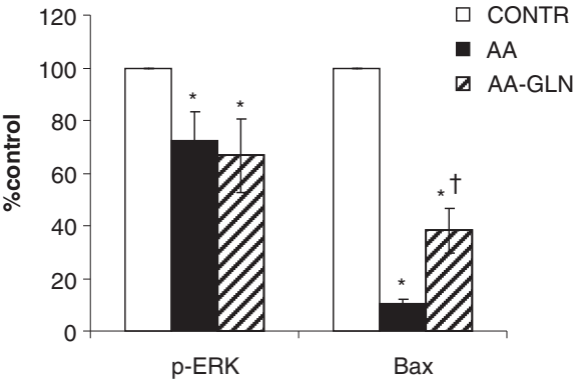

Supplement: MOESM7 [file 25655022]
